# Supplementary material for: Flexible and high energy density solid-state asymmetric supercapacitor based on polythiophene nanocomposites and charcoal
Source: Royal Society of Chemistry journal article supplement (doi:10.1039/c8ra06102e), 2018-01-01
Supplement: c8ra06102e1.pdf [file c8ra06102e1.pdf]

## Supporting information

### Flexible and High Energy Density Solid-State Asymmetric Supercapacitor Based on Polythiophene Nanocomposites and Charcoal

Vijeth H, Ashokkumar S P, Yesappa L, Niranjana M, Vandana M, Devendrappa H\*

Department of physics, Mangalore University, Mangalagangothri, 574199, India

\*Corresponding Author: [dehu2010@gmail.com](mailto:dehu2010@gmail.com)

**Table S1.** Weight loses at different temperature range of PTH, PTHA1, PTHA3, and PTHA5 composites.

| Samples | Initial temperature range (°C) | Weight loss (%) | Decomposition temperature range (°C) | Weight loss (%) | Total Weight loss (%) |
|---------|--------------------------------|-----------------|--------------------------------------|-----------------|-----------------------|
| PTH     | 30-70                          | 4.26            | 190-626                              | 89.91           | 94.17                 |
| PTHA1   | 30-77                          | 5.11            | 191-607                              | 54.44           | 59.55                 |
| PTHA2   | 30-74                          | 4.74            | 194-579                              | 31.26           | 36                    |
| PTHA5   | 30-82                          | 6.26            | 186-569                              | 23.58           | 29.84                 |

**Table S2.** Specific capacitance calculated from CV for PTHA and Charcoal electrode for various current densities.

| Scan rate (mV/s) | Specific capacitance (F/g) for PTHA | Specific capacitance (F/g) for Charcoal |
|------------------|-------------------------------------|-----------------------------------------|
| 10               | 582.23                              | 491                                     |
| 30               | 391.55                              | 376.49                                  |
| 50               | 342.44                              | 331.07                                  |
| 100              | 218.7                               | 230.95                                  |

**Table S3.** Comparison of Energy density and power density of PTHA//Charcoal ASC with other reported results.

| ASC Electrode material  | Energy density (W h/kg) | Power density (W/kg) | References   |
|-------------------------|-------------------------|----------------------|--------------|
| PANI G@MnO <sub>2</sub> | 30.6                    | 197                  | S1           |
| VS2// C-Fe/PANI         | 27.8                    | 2991.5               | S3           |
| NMP2 ASC                | 34.4                    | 500                  | S5           |
| PTHA//Charcoal          | 42.00                   | 735.86               | Present work |

**Table S4.** Specific capacitance calculated from GCD for PTHA and Charcoal electrode for various current densities.

| PTHA                  |                            | Charcoal              |                            |
|-----------------------|----------------------------|-----------------------|----------------------------|
| Current density (A/g) | Specific capacitance (F/g) | Current density (A/g) | Specific capacitance (F/g) |
| 1                     | 554.03                     | 1.4                   | 374.71                     |
| 1.4                   | 494.05                     | 2                     | 347.83                     |
| 2                     | 433.33                     | 3                     | 316.06                     |
| 3                     | 386.45                     | 4                     | 279.44                     |

## Reference

- (S1). M. A. Bavio, G. G. Acosta, T. Kessler and A. Visintin, *Energy*, 2017, **130**, 22-28.
- (S3). M. N. Rantho, M. J. Madito, F. O. Ochai-Ejeh and N. Manyala, *Electrochim. Acta*, 2018, **260**, 11-23.
- (S5). H. Wang, Y. Song, J. Zhou, X. Xu, W. Hong, J. Yan and J. Gao, *Electrochim. Acta*, 2016, **212**, 775-783.
